# Supplementary material for: Skin microbiome of beluga whales: spatial, temporal, and health-related dynamics
Source: PubMed Central journal article supplement (PMC7807513; doi:10.1186/s42523-020-00057-1), 2020-10-22

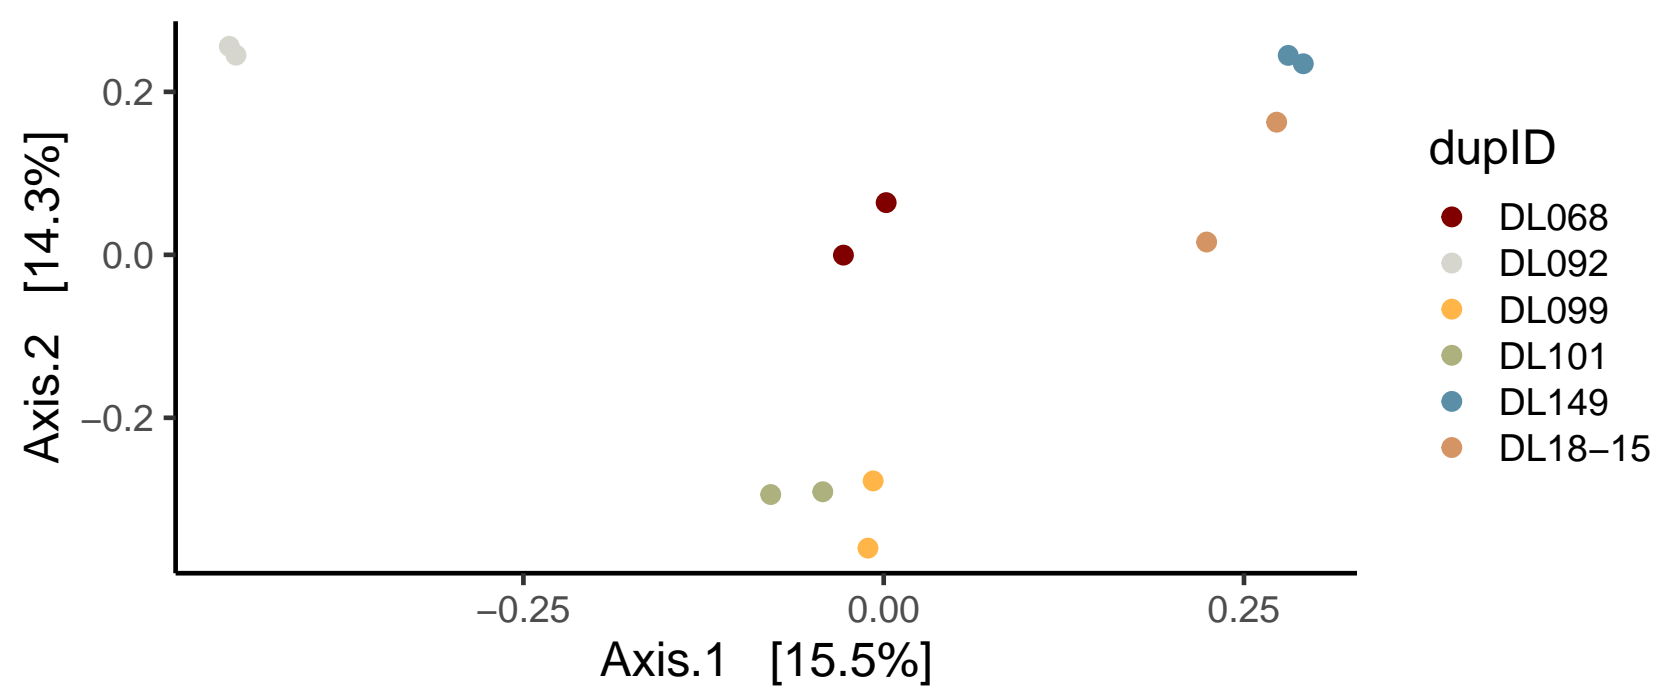

Supplement: 42523_2020_57_MOESM1_ESM.pdf [file 42523_2020_57_MOESM1_ESM.pdf]
