# Supplementary material for: Skin microbiome of beluga whales: spatial, temporal, and health-related dynamics
Source: Anim Microbiome. 2020 Oct 22;2:39. doi: 10.1186/s42523-020-00057-1 (PMC7807513; doi:10.1186/s42523-020-00057-1)
Supplement: Supplementary file 2 — Additional file 2: Supplemental Table S1.. Sample metadata for all samples included in this study (i.e. all samples that passed quality control analyses), including sampling location and population, year, and NCBI Genbank Accession number, among other data. [file 42523_2020_57_MOESM2_ESM.csv]

samples	Genbank Accession #	fieldID	MML_Biopsy#	MML_Sample_label	LocationDesc	ColorClass	AgeClass	Organization	region	location	sex	year	month	health	skinhealth	skinhealth2	molt	age	stranded	latitude	longitude	GPS/estimate
DL17-2	SAMN15503410	MML-RA170902-B02	MML-RA170902-B02	DLCIB17-02	Knik Arm-Eagle Bay	DG	Juvenile	NMML	CI	NA	F	2017	September		NA	NA	NA	adult	no	61.35172	-149.722	GPS
DL17-3	SAMN15503411	MML-RA170902-B03	MML-RA170902-B03	DLCIB17-03	Knik Arm-lower	WH	Adult	NMML	CI	NA	M	2017	September		NA	NA	NA	adult	no	61.32522	-149.796	GPS
DL17-4	SAMN15503412	MML-RA170902-B04	MML-RA170902-B04	DLCIB17-04	Knik Arm-lower	WH	Adult	NMML	CI	NA	M	2017	September		NA	NA	NA	adult	no	61.32516	-149.818	GPS
DL17-5	SAMN15503413	MML-RA170903-B01	MML-RA170903-B01	DLCIB17-05	Knik Arm-Goose Bay	DW	Adult	NMML	CI	NA	M	2017	September		NA	NA	NA	adult	no	61.35734	-149.884	GPS
DL17-6	SAMN15503414	MML-RA170903-B02	MML-RA170903-B02	DLCIB17-06	Knik Arm-Goose Bay	WH	Adult	NMML	CI	NA	F	2017	September		NA	NA	NA	adult	no	61.348937	-149.862942	GPS
DL17-7	SAMN15503415	MML-RA170904-B01	MML-RA170904-B01	DLCIB17-07	Susitna delta-east	WH	Adult	NMML	CI	NA	M	2017	September		NA	NA	NA	adult	no	61.182642	-150.52207	GPS
DL17-8	SAMN15503416	MML-RA170907-B01	MML-RA170907-B01	DLCIB17-08	Knik Arm-Eagle Bay	DG	Juvenile	NMML	CI	NA	F	2017	September		NA	NA	NA	adult	no	61.306135	-149.845778	GPS
DL17-9	SAMN15503417	MML-RA170907-B02	MML-RA170907-B02	DLCIB17-09	Knik Arm-lower	WH	Adult	NMML	CI	NA	M	2017	September		NA	NA	NA	adult	no	61.35928	-149.717577	GPS
DL17-10	SAMN15503418	MML-RA170909-B01	MML-RA170909-B01	DLCIB17-10	Chickaloon Bay	WH	Juvenile	NMML	CI	NA	F	2017	September		NA	NA	NA	adult	no	60.985888	-150.300252	GPS
DL17-11	SAMN15503419	MML-RA170909-B02	MML-RA170909-B02	DLCIB17-11	Chickaloon Bay	WH	Adult	NMML	CI	NA	F	2017	September		NA	NA	NA	adult	no	60.987122	-150.300888	GPS
DL17-12	SAMN15503420	MML-RA170909-B03	MML-RA170909-B03	DLCIB17-12	Chickaloon Bay	WH	Adult	NMML	CI	NA	F	2017	September		NA	NA	NA	adult	no	60.989093	-150.30277	GPS
DL013	SAMN15503421	DL1403						MMHSRP	CI	Kincaid	M	2014		2	NA	NA	NA	fetus	no	61.145	-150.075	estimate
DL016	SAMN15503422	UNK						UNK	NA	NA	NA	NA		NA	NA	NA	NA	NA	NA	NA	NA	NA
DL020	SAMN15503423	CIDL-07OCT13 2013177						MMHSRP	CI	Turnagain	M	2013		3	NA	NA	NA	adult	no	61.009	-150.135	estimate
DL030	SAMN15503424	DLBBN14-01 2014165 DL1406; 2014-CIB						MMHSRP	CI	Turnagain	M	2014		3	NA	NA	NA	adult	stranded	60.986	-149.883	estimate
DL034	SAMN15503425	2014160						MMHSRP	CI	Tyonek	F	2014		3	NA	NA	NA	adult	stranded	60.986	-151.159	estimate
DL039	SAMN15503426	DLBB13-01						NMML	BB	GrassIsland	F	2013		1	healthy	healthy	no	adult	no
DL040	SAMN15503427	DLBB13-04						NMML	BB	Dillingham	F	2013		1	healthy	healthy	no	adult	no	59.013	-158.477	estimate
DL041	SAMN15503428	DLBB13-05						NMML	BB	Dillingham	M	2013		1	healthy	healthy	no	adult	no	59.013	-158.477	estimate
DL042	SAMN15503429	DLBB14-01						NMML	BB	Dillingham	M	2014		1	minor_lesions	disease	NA	adult	no	59.013	-158.477	estimate
DL043	SAMN15503430	DLBB14-02						NMML	BB	BlackSlough	M	2014		1	major_lesions	disease	NA	adult	no
DL044	SAMN15503431	DLBB14-08						NMML	BB	Dillingham	M	2014		1	minor_lesions	disease	NA	adult	no	59.013	-158.477	estimate
DL048	SAMN15503432	DL1201 2012106						MMHSRP	CI	Kenai	M	2012		2.5	NA	NA	NA	juvenile	no	60.505	-151.453	estimate
DL050	SAMN15503433	DLBB12-01						NMML	BB	Dillingham	M	2012		1	dermatitus	disease	NA	adult	no	59.013	-158.477	estimate
DL054	SAMN15503434	DLBB12-09						NMML	BB	Dillingham	F	2012		1	dermatitus	disease	NA	adult	no	59.013	-158.477	estimate
DL056	SAMN15503435	DLBB12-10						NMML	BB	Dillingham	F	2012		1	NA	NA	NA	adult	no	59.013	-158.477	estimate
DL058	SAMN15503436	DLBB16-01						??	BB	Dillingham	F	2016		1	NA	NA	NA	adult	no	59.013	-158.477	estimate
DL059	SAMN15503437	DLBB16-02						??	BB	Dillingham	F	2016		1	NA	NA	NA	adult	no	59.013	-158.477	estimate
DL061	SAMN15503438	DLBB16-03						??	BB	Dillingham	M	2016		1	NA	NA	NA	adult	no	59.013	-158.477	estimate
DL062	SAMN15503439	DLBB16-04						??	BB	Dillingham	M	2016		1	NA	NA	NA	subadult	no	59.013	-158.477	estimate
DL063	SAMN15503440	DLBB16-05						??	BB	Dillingham	M	2016		1	NA	NA	NA	subadult	no	59.013	-158.477	estimate
DL064	SAMN15503441	DLBB16-06						??	BB	Dillingham	M	2016		1	NA	NA	NA	adult	no	59.013	-158.477	estimate
DL065	SAMN15503442	DLBB16-07						??	BB	Dillingham	M	2016		1	NA	NA	NA	subadult	no	59.013	-158.477	estimate
DL066	SAMN15503443	DLBB16-08						??	BB	Dillingham	M	2016		1	NA	NA	NA	adult	no	59.013	-158.477	estimate
DL067	SAMN15503444	DLBB16-09						??	BB	Dillingham	M	2016		1	NA	NA	NA	adult	no	59.013	-158.477	estimate
DL068	SAMN15503445	DLBB12-06						NMML	BB	Dillingham	F	2012		1	dermatitus	disease	NA	adult	no	59.013	-158.477	estimate
DL068-dup	SAMN15503446	DLBB12-06						NMML	BB	Dillingham	F	2012		1	dermatitus	disease	NA	adult	no	59.013	-158.477	estimate
DL070	SAMN15503447	DLBB12-07						NMML	BB	Dillingham	M	2012			healthy	healthy	no	subadult	no	59.013	-158.477	estimate
DL071	SAMN15503448	DLBB14-04						NMML	BB	BlackSlough	M	2014		1	molt	healthy	molt	adult	no	59.054	-158.37	estimate
DL072	SAMN15503449	DLBB14-05						NMML	BB	BlackSlough	M	2014		1	minor_lesions	disease	NA	adult	no	59.054	-158.37	estimate
DL073	SAMN15503450	DLBB13-10						NMML	BB	CombineFlats	F	2013		1	major_lesions	disease	NA	adult	no
DL075	SAMN15503451	BBN05-08						NMML	BB	Dillingham	F	2008		1	healthy	healthy	no	juvenile	no	59.013	-158.477	estimate
DL078	SAMN15503452	DLBB14-03						NMML	BB	Dillingham	M	2014		1	major_lesions	disease	NA	adult	no	59.013	-158.477	estimate
DL079	SAMN15503453	BBN03-08						NMML	BB	Dillingham	F	2008		1	molt	healthy	molt	adult	no	59.013	-158.477	estimate
DL081	SAMN15503454	DLBB14-07						NMML	BB	Dillingham	M	2014		1	minor_lesions	disease	NA	adult	no	59.013	-158.477	estimate
DL082	SAMN15503455	DLBB13-08						NMML	BB	Dillingham	M	2013		1	minor_lesions	disease	NA	adult	no	59.013	-158.477	estimate
DL086	SAMN15503456	DLBB12-05						NMML	BB	Dillingham	F	2012		1	minor_lesions	disease	NA	adult	no	59.013	-158.477	estimate
DL088	SAMN15503457	DLBB14-09						NMML	BB	Dillingham	F	2014		1	healthy	healthy	no	adult	no	59.013	-158.477	estimate
DL088-dup	SAMN15503458	DLBB14-09						NMML	BB	Dillingham	F	2014		1	healthy	healthy	no	adult	no	59.013	-158.477	estimate
DL089	SAMN15503459	DLBB13-07						NMML	BB	GrassIsland	F	2013		1	healthy	healthy	no	adult	no	59.006	-158.459	estimate
DL092	SAMN15503460	DLBB14-06						NMML	BB	Nushugak	F	2014		1	molt	healthy	molt	adult	no	58.947	-158.495	estimate
DL092-dup	SAMN15503461	DLBB14-06						NMML	BB	Nushugak	F	2014		1	molt	healthy	molt	adult	no	58.947	-158.495	estimate
DL093	SAMN15503462	BBN01-08						NMML	BB	Dillingham	F	2008		1	molt	healthy	molt	juvenile	no	59.013	-158.477	estimate
DL095	SAMN15503463	DLBB12-02						NMML	BB	Dillingham	F	2012		1	healthy	healthy	no	adult	no	59.013	-158.477	estimate
DL096	SAMN15503464	DLBB12-03						NMML	BB	Dillingham	F	2012		1	dermatitus	disease	NA	juvenile	no	59.013	-158.477	estimate
DL097	SAMN15503465	DLBB13-06						NMML	BB	GrassIsland	M	2013		1	healthy	healthy	no	adult	no	59.006	-158.459	estimate
DL098	SAMN15503466	DLBB14-10						NMML	BB	SnakeRiver	F	2014		1	healthy	healthy	no	adult	no	58.855	-158.74	estimate
DL099	SAMN15503467	DLBB12-04						NMML	BB	Dillingham	M	2012		1	minor_lesions	disease	NA	adult	no	59.013	-158.477	estimate
DL099-dup	SAMN15503468	DLBB12-04						NMML	BB	Dillingham	M	2012		1	minor_lesions	disease	NA	adult	no	59.013	-158.477	estimate
DL101	SAMN15503469	DLBB13-09						NMML	BB	GrassIsland	M	2013		1	minor_lesions	disease	NA	adult	no	59.006	-158.459	estimate
DL101-dup	SAMN15503470	DLBB13-09						NMML	BB	GrassIsland	M	2013		1	minor_lesions	disease	NA	adult	no	59.006	-158.459	estimate
DL107	SAMN15503471	UNK						UNK	NA	NA	NA	NA		NA	NA	NA	NA	NA	no	NA	NA	NA
DL108	SAMN15503472	UNK						UNK	NA	NA	NA	NA		NA	NA	NA	NA	NA	no	NA	NA	NA
DL109	SAMN15503473	UNK						UNK	NA	NA	NA	NA		NA	NA	NA	NA	NA	no	NA	NA	NA
DL147	SAMN15503474	DL-CIB16-31	MML-RA160813-B01	DLCIB16-31	Susitna delta-Little Susitna River	MG	Sub-Adult	NMML	CI	Susitna	F	2016	August	NA	NA	NA	NA	NA	no	61.2393	-150.2642	NA
DL148	SAMN15503475	DL-CIB16-32	MML-RA160815-B01	DLCIB16-32	Susitna delta-Little Susitna River	DW	Adult	NMML	CI	Susitna	M	2016	August	NA	NA	NA	NA	NA	no	61.2436	-150.2764	NA
DL149	SAMN15503476	DL-CIB16-33	MML-RA160816-B01	DLCIB16-33	Susitna delta-Little Susitna River	MG	Juvenile	NMML	CI	Susitna	F	2016	August	NA	NA	NA	NA	NA	no	61.2375	-150.2764	NA
DL149-dup	SAMN15503477	DL-CIB16-33	MML-RA160816-B01	DLCIB16-33	Susitna delta-Little Susitna River	MG	Juvenile	NMML	CI	Susitna	F	2016	August	NA	NA	NA	NA	NA	no	61.2375	-150.2764	NA
DL150-dup	SAMN15503478	DL-CIB16-34	MML-RA160819-B01	DLCIB16-34	Knik Arm-Eagle River	DW	Adult	NMML	CI	EagleRiver	F	2016	August	NA	NA	NA	NA	NA	no	61.3278	-149.7382	NA
DL151	SAMN15503479	DL-CIB16-35	MML-RA160819-B02	DLCIB16-35	Knik Arm-Eagle River	DW	Adult	NMML	CI	EagleRiver	F	2016	August	NA	NA	NA	NA	NA	no	61.3278	-149.7382	NA
DL152	SAMN15503480	DL-CIB16-36	MML-RA160820-B01	DLCIB16-36	Knik Arm-Eagle River	DW	Adult	NMML	CI	EagleRiver	F	2016	August	NA	NA	NA	NA	NA	no	61.3278	-149.7382	NA
DL18-10	SAMN15503481	MML-RA180910-B04	MML-RA180910-B04	DLCIB18-10	Chickaloon Bay-Chickaloon River	WH	Adult	NMML	CI	NA	M	2018	September	NA	NA	NA	NA	NA	no	60.9594	-150.0307	GPS
DL18-11	SAMN15503482	MML-RA180910-B05	MML-RA180910-B05	DLCIB18-11	Chickaloon Bay-Chickaloon River	LG	Adult	NMML	CI	NA	M	2018	September	NA	NA	NA	NA	NA	no	60.9593	-149.935	GPS
DL18-12	SAMN15503483	MML-RA180911-B01	MML-RA180911-B01	DLCIB18-12	Chickaloon Bay-Chickaloon River	MG	Sub-Adult	NMML	CI	NA	F	2018	September	NA	NA	NA	NA	NA	no	60.9763	-150.1329	GPS
DL18-15	SAMN15503484	MML-RA180911-B04	MML-RA180911-B04	DLCIB18-15	Chickaloon Bay-Chickaloon River	LG	Adult	NMML	CI	NA	M	2018	September	NA	NA	NA	NA	NA	no	60.972	-150.0785	GPS
DL18-15-dup	SAMN15503485	MML-RA180911-B04	MML-RA180911-B04	DLCIB18-15	Chickaloon Bay-Chickaloon River	LG	Adult	NMML	CI	NA	M	2018	September	NA	NA	NA	NA	NA	no	60.972	-150.0785	GPS
DL18-16	SAMN15503486	MML-RA180911-B05	MML-RA180911-B05	DLCIB18-16	Chickaloon Bay-Chickaloon River	LG	Sub-Adult	NMML	CI	NA	M	2018	September	NA	NA	NA	NA	NA	no	60.9715	-150.0729	GPS
DL18-17	SAMN15503487	MML-RA180912-B01	MML-RA180912-B01	DLCIB18-17	Chickaloon Bay-Burnt Island	DW	Adult	NMML	CI	NA	M	2018	September	NA	NA	NA	NA	NA	no	60.9587	-149.9416	GPS
DL18-18	SAMN15503488	MML-RA180912-B02	MML-RA180912-B02	DLCIB18-18	Chickaloon Bay-Burnt Island	WH	Adult	NMML	CI	NA	M	2018	September	NA	NA	NA	NA	NA	no	60.959	-149.9314	GPS
DL18-19	SAMN15503489	MML-RA180912-B03	MML-RA180912-B03	DLCIB18-19	Chickaloon Bay-Burnt Island	WH	Adult	NMML	CI	NA	M	2018	September	NA	NA	NA	NA	NA	no	60.9745	-149.8979	GPS
DL18-2	SAMN15503490	MML-RA180906-B02	MML-RA180906-B02	DLCIB18-02	Chickaloon Bay-Bluffs	WH	Adult	NMML	CI	NA	M	2018	September	NA	NA	NA	NA	NA	no	60.9758	-150.2283	GPS
DL18-20	SAMN15503491	MML-RA180912-B04	MML-RA180912-B04	DLCIB18-20	Chickaloon Bay-Burnt Island	WH	Adult	NMML	CI	NA	M	2018	September	NA	NA	NA	NA	NA	no	60.9751	-149.8863	GPS
DL18-21	SAMN15503492	MML-RA180912-B05	MML-RA180912-B05	DLCIB18-21	Chickaloon Bay-Burnt Island	LG	Adult	NMML	CI	NA	F	2018	September	NA	NA	NA	NA	NA	no	60.9762	-149.8786	GPS
DL18-3	SAMN15503493	MML-RA180906-B03	MML-RA180906-B03	DLCIB18-03	Chickaloon Bay-Bluffs	LG	Adult	NMML	CI	NA	M	2018	September	NA	NA	NA	NA	NA	no	60.954	-150.1585	GPS
DL18-4	SAMN15503494	MML-RA180909-B01	MML-RA180909-B01	DLCIB18-04	Chickaloon Bay-Bluffs	WH	Adult	NMML	CI	NA	M	2018	September	NA	NA	NA	NA	NA	no	61.0025	-150.3101	GPS
DL18-5	SAMN15503495	MML-RA180909-B02	MML-RA180909-B02	DLCIB18-05	Chickaloon Bay-Burnt Island	DW	Adult	NMML	CI	NA	M	2018	September	NA	NA	NA	NA	NA	no	60.9703	-149.9376	GPS
DL18-6	SAMN15503496	MML-RA180909-B03	MML-RA180909-B03	DLCIB18-06	Chickaloon Bay-Burnt Island	WH	Adult	NMML	CI	NA	M	2018	September	NA	NA	NA	NA	NA	no	60.9775	-149.8064	GPS
DL18-7	SAMN15503497	MML-RA180910-B01	MML-RA180910-B01	DLCIB18-07	Chickaloon Bay-Chickaloon River	LG	Adult	NMML	CI	NA	F	2018	September	NA	NA	NA	NA	NA	no	60.9691	-150.0951	GPS
DL18-8	SAMN15503498	MML-RA180910-B02	MML-RA180910-B02	DLCIB18-08	Chickaloon Bay-Chickaloon River	LG	Adult	NMML	CI	NA	F	2018	September	NA	NA	NA	NA	NA	no	60.9705	-150.1023	GPS
DL18-9	SAMN15503499	MML-RA180910-B03	MML-RA180910-B03	DLCIB18-09	Chickaloon Bay-Chickaloon River	DW	Adult	NMML	CI	NA	F	2018	September	NA	NA	NA	NA	NA	no	60.971	-150.1015	GPS
